# Supplementary material for: Fluoride-assisted crystallization regulation enables efficient and stable wide-bandgap perovskite photovoltaic
Source: Royal Society of Chemistry journal article supplement (doi:10.1039/d2ta08966a), 2023-01-01
Supplement: d2ta08966a1.pdf [file d2ta08966a1.pdf]

# Supplementary Information

## Fluoride-Assisted Crystallization Regulation Enables Efficient and Stable Wide-Bandgap Perovskite Photovoltaic

Chao Su,<sup>a</sup> Rui Wang,<sup>a</sup> Junlei Tao,<sup>a</sup> Jinliang Shen,<sup>a</sup> Di Wang,<sup>b</sup> Lixin Wang,<sup>a,c</sup>  
Guangsheng Fu,<sup>a,c</sup> Shaopeng Yang,<sup>\*a,c</sup> Mingjian Yuan<sup>b</sup> and Tingwei He <sup>\*a,c</sup>

a Hebei Key Laboratory of Optic-electronic Information and Materials, College of  
Physics Science and Technology, Hebei University, Baoding 071002, China;

b Department of Chemistry, Nankai University, Tianjin 300071, China;

c Province-Ministry Co-construction Collaborative Innovation Center of Hebei  
Photovoltaic Technology, Hebei University, Baoding 071002, China;

\* Corresponding author

Email: spyang@hbu.edu.cn, htw2022@hbu.edu.cn

## 1. Supplementary Characterizations and Measurements.

**Absorption spectra** were measured on a Hitachi U-3900/3900H UV-vis spectrophotometer.

**Surface morphological** characterizations of the perovskite films were performed by Field emission scanning electron microscope (SEM) (Nova NanoSEM450).

**Thermal admittance spectroscopy** analysis could be obtained by capacitance-frequency curve using PARSTAT 4000 was used to measure the capacitance-frequency curve. The energy profile of trap density of states could be fitted from the

equation:  $N_t(E_\omega) = -\frac{V_{bi} dC \omega}{eWd\omega k_B T}$ . Where  $V_{bi}$  is the built in voltage,  $\omega$  is angular frequency,  $e$  is the elementary charge,  $W$  is the depletion width,  $C$  is the capacitance,  $k_B$  is the Boltzmann constant and  $T$  is the temperature.

**The contact angle** of perovskite film was measured by Micro Capture Pro and analyzed by Image J software.

## 2. Supplementary Figures

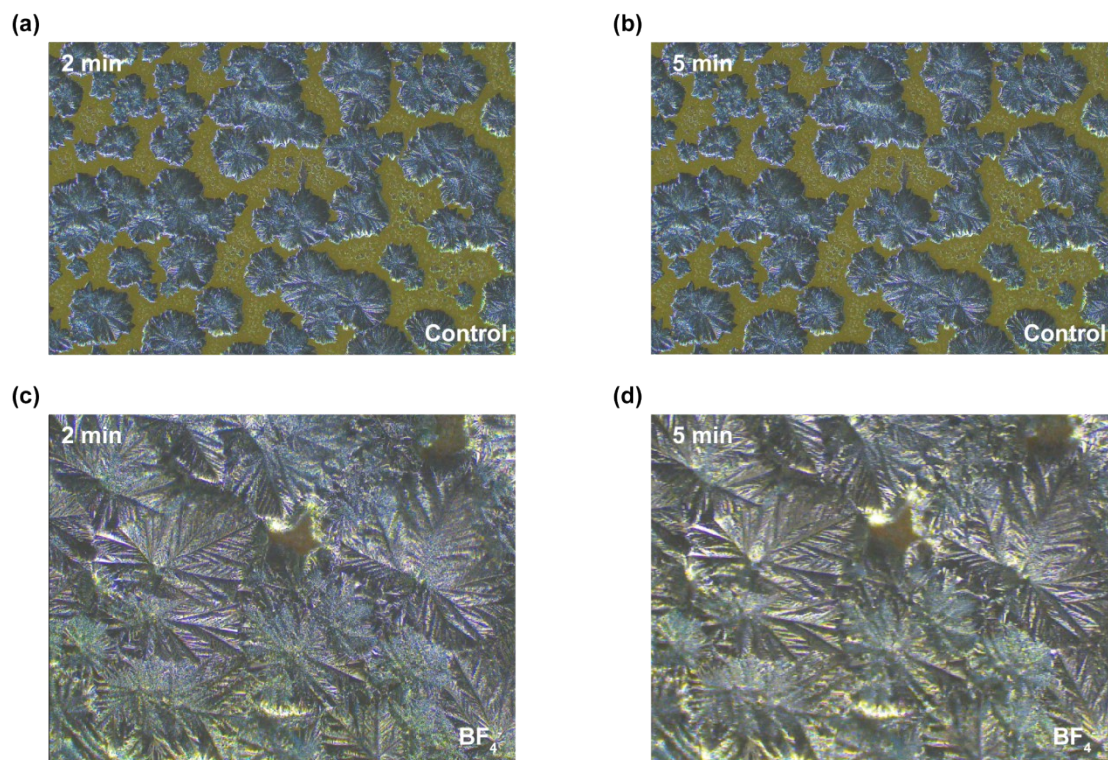

**Fig. S1.** The laser confocal microscope images of in-situ crystallization kinetics of perovskite precursor solution (a) at 2 min and (b) at 5 min. The laser confocal microscope images of in-situ crystallization kinetics of perovskite precursor solution with  $\text{BF}_4^-$  (c) at 2min and (d) at 5 min

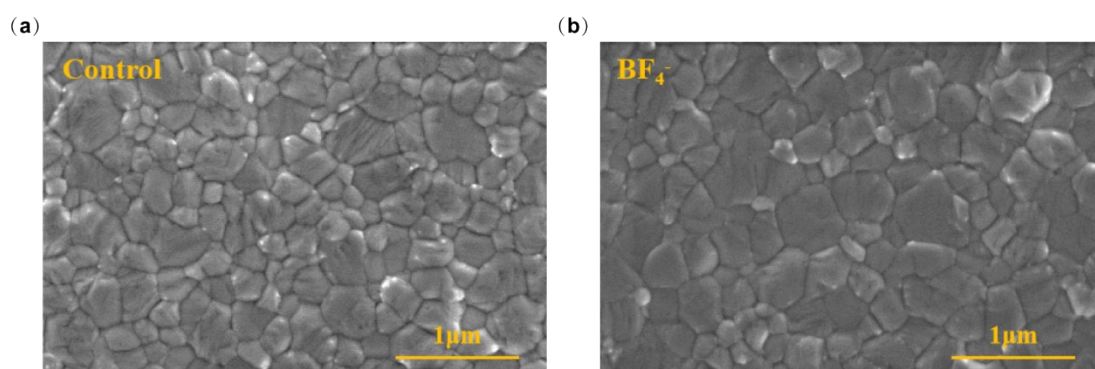

**Fig. S2.** (a) SEM images of control perovskite films and (b) with  $\text{BF}_4^-$ .

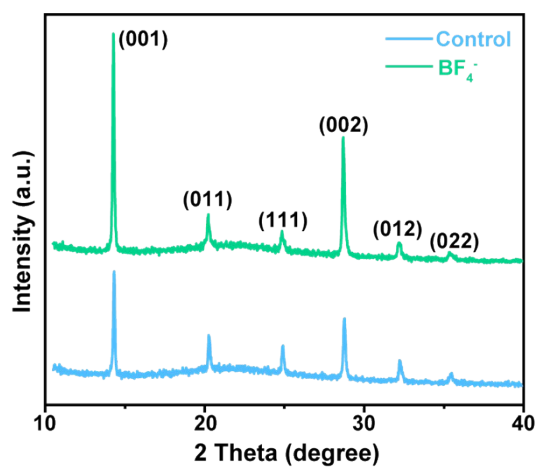

Fig. S3. XRD patterns of the perovskite films.

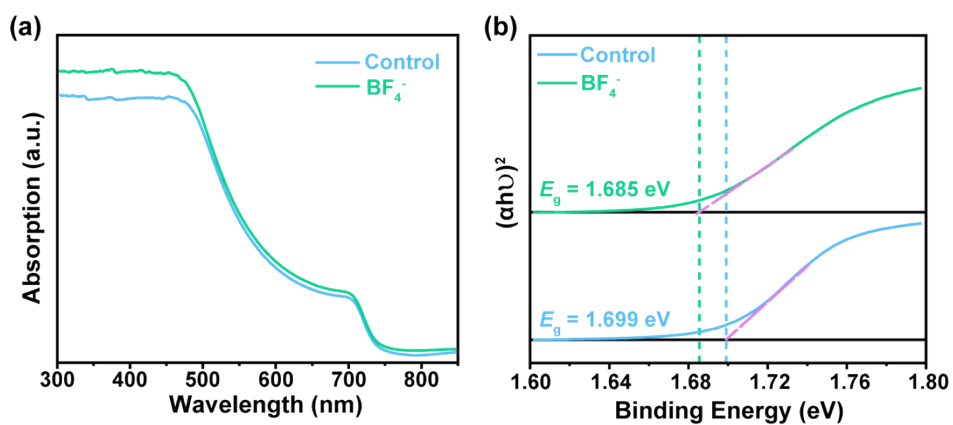

Fig. S4. (a) UV-vis absorbance spectra and (b) the relevant Tauc plot of the perovskite films.

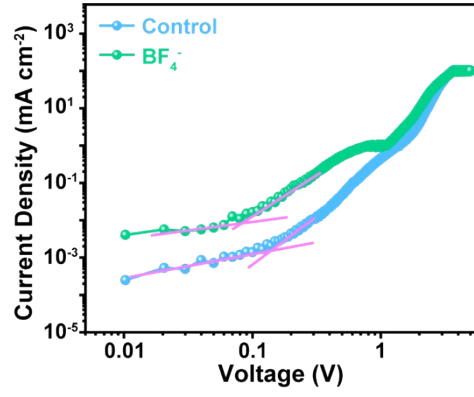

**Fig. S5.** Dark  $J$ - $V$  Curves of ITO/PTAA/perovskite/Spiro-OMeTAD/Au structure.

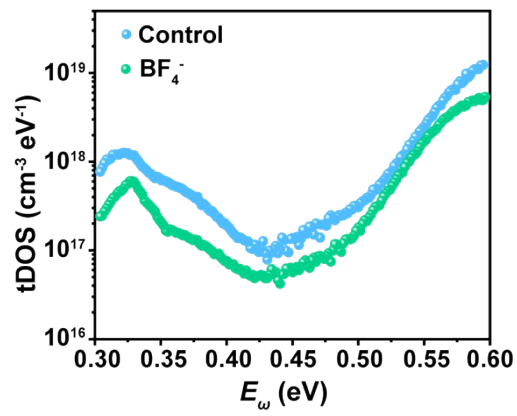

**Fig. S6.** Thermal admittance spectroscopy of wide-bandgap perovskite films.

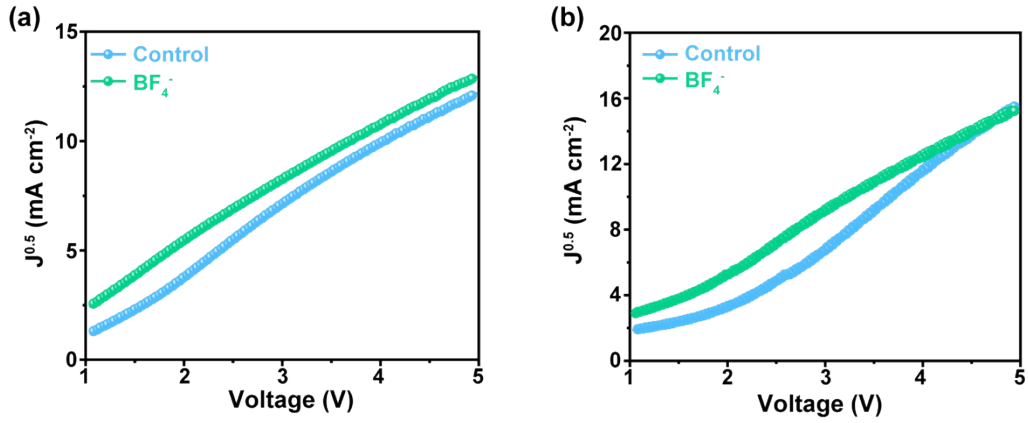

**Fig. S7.** (a) The electron mobility of the perovskite films using the SCLC model. (b) The hole mobility of the perovskite films using the SCLC model.

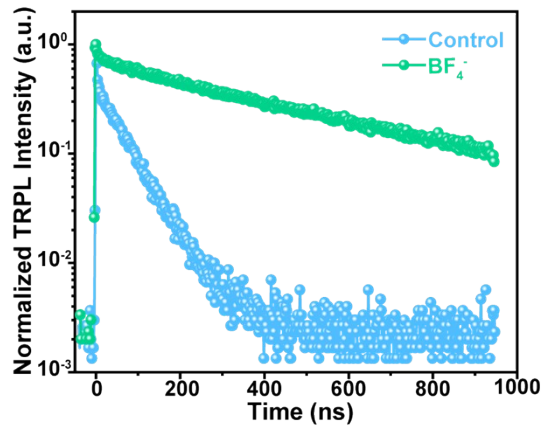

**Fig. S8.** TRPL spectra of the perovskite films.

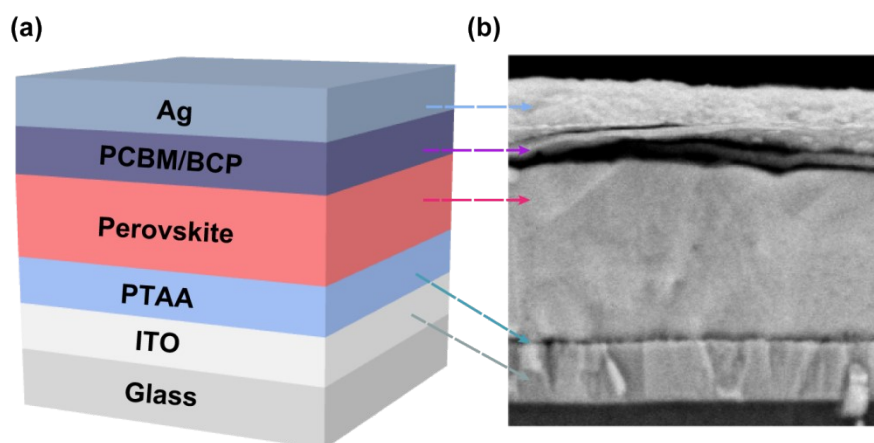

**Fig. S9.** (a) Schematic diagram of the device structure and (b) corresponding SEM sectional view.

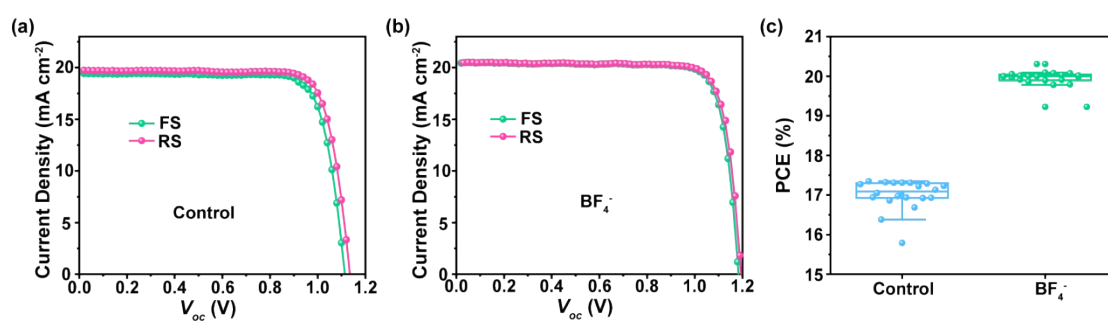

**Fig. S10.** The  $J-V$  curves of perovskite photovoltaics for different scanning directions of (a) without and (b) with  $\text{BF}_4^-$ . (c) PCE distribution of perovskite solar cells without and with  $\text{BF}_4^-$ .

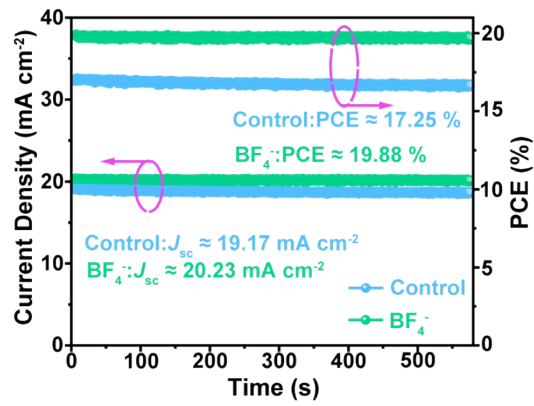

Fig. S11. Steady-state power output of PSCs at the maximum power point.

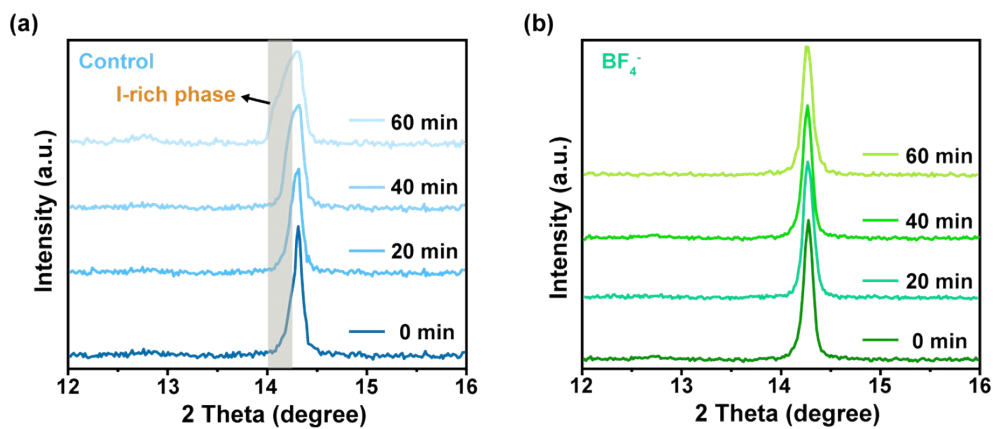

Fig. S12. XRD patterns of control and with  $\text{BF}_4^-$  at various times with 515 nm laser ( $100 \text{ mW cm}^{-2}$ ).



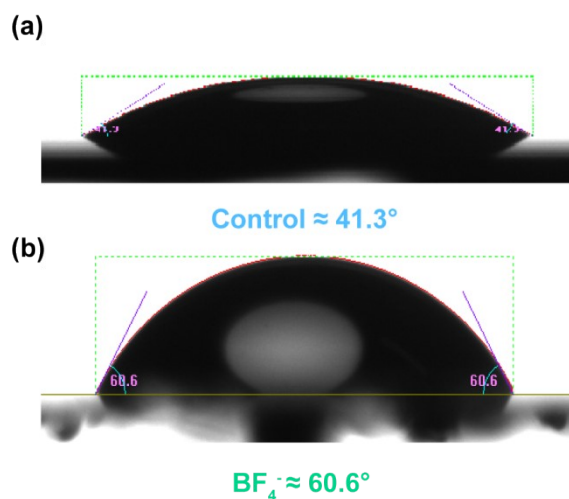

**Fig. S13.** (a) The water contact angles of control perovskite films and (b) with  $\text{BF}_4^-$ .

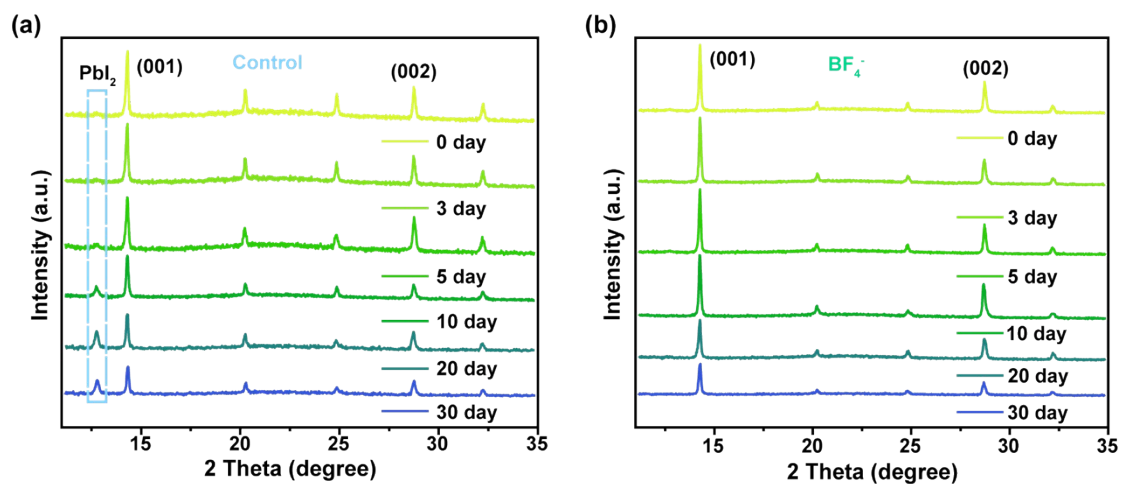

**Fig. S14.** XRD patterns of perovskite films deposited continuously for 30 days (a) control and (b) with  $\text{BF}_4^-$  ions under an atmospheric environment with 45-50% RH.

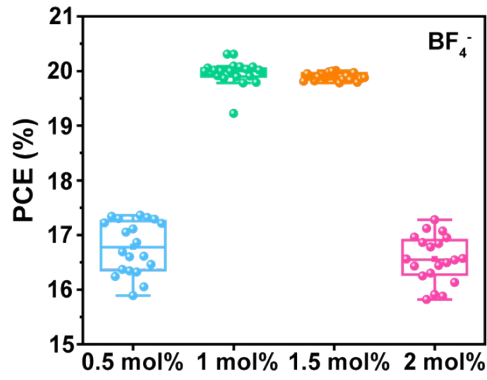

**Fig. S15.** The concentration optimization of  $\text{BF}_4^-$  in perovskite precursor solution.

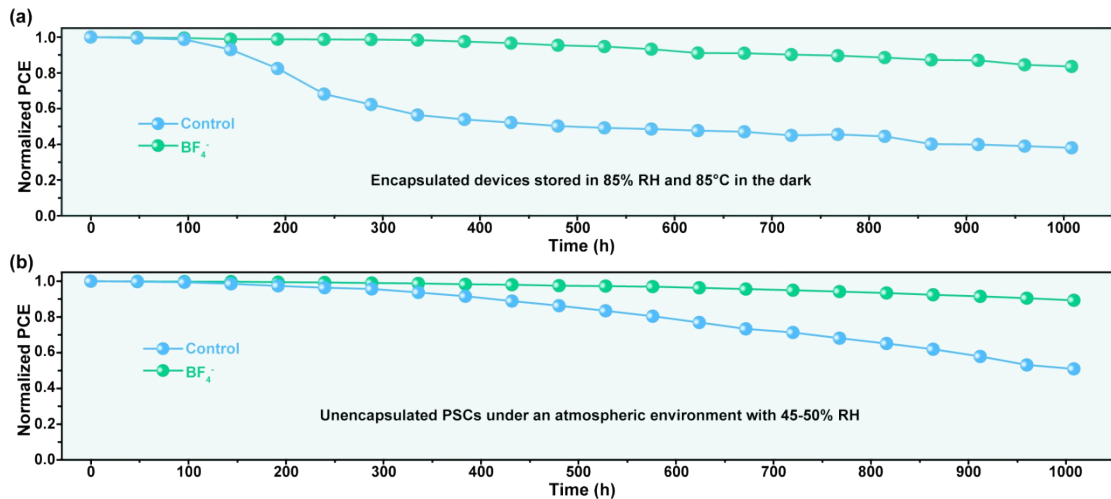

**Fig. S16.** (a) PCE evolution of encapsulated devices stored in 85% RH and 85°C in the dark. (b) PCE evolution of unencapsulated PSCs under an atmospheric environment with 45-50% RH.

### 3. Supplementary Tables

**Table S1.** The FWHM values of (001) plan of perovskite films.

| Sample                       | 2Theta( $\theta$ ) of 001 | FWHM  |
|------------------------------|---------------------------|-------|
| Control                      | 14.31                     | 0.133 |
| BF <sub>4</sub> <sup>-</sup> | 14.27                     | 0.127 |

**Table S2.** Parameters of  $\mu_h$ ,  $\mu_e$ ,  $\mu_h/\mu_e$ , and Trap Density ( $n_{trap}$ ) of Perovskite Films.

| Sample                       | $\mu_h$ (cm <sup>2</sup> V <sup>-1</sup> s <sup>-1</sup> ) | $\mu_e$ (cm <sup>2</sup> V <sup>-1</sup> s <sup>-1</sup> ) | $\mu_h/\mu_e$ | $n_{trap-e}$ (cm <sup>-3</sup> ) | $n_{trap-h}$ (cm <sup>-3</sup> ) |
|------------------------------|------------------------------------------------------------|------------------------------------------------------------|---------------|----------------------------------|----------------------------------|
| Control                      | $2.69 \times 10^{-4}$                                      | $1.79 \times 10^{-4}$                                      | 1.50          | $1.55 \times 10^{16}$            | $5.97 \times 10^{15}$            |
| BF <sub>4</sub> <sup>-</sup> | $1.74 \times 10^{-4}$                                      | $1.50 \times 10^{-4}$                                      | 1.16          | $4.44 \times 10^{15}$            | $3.48 \times 10^{15}$            |

**Table S3.** Photovoltaic parameters and hysteresis index of PSCs.

| Devices                      | Direction | $V_{oc}$ (V) | $J_{sc}$ (mA cm <sup>-2</sup> ) | FF    | PCE (%) | HI   |
|------------------------------|-----------|--------------|---------------------------------|-------|---------|------|
| Control                      | FS        | 1.11         | 19.42                           | 80.27 | 17.31   | 0.04 |
|                              | RS        | 1.13         | 19.73                           | 80.87 | 18.03   |      |
| BF <sub>4</sub> <sup>-</sup> | FS        | 1.18         | 20.43                           | 83.33 | 20.09   | 0.01 |
|                              | RS        | 1.19         | 20.46                           | 83.34 | 20.29   |      |

**Table S4.** The parameters of the TRPL spectra of perovskite films.

| Sample                       | A <sub>1</sub> (%) | $\tau_1$ (ns) | A <sub>2</sub> (%) | $\tau_2$ (ns) | $\tau_{ave}$ (ns) |
|------------------------------|--------------------|---------------|--------------------|---------------|-------------------|
| Control                      | 59.39              | 2.36          | 40.61              | 63.82         | 60.67             |
| BF <sub>4</sub> <sup>-</sup> | 25.21              | 7.79          | 74.79              | 380.42        | 377.45            |

**Table S5.** EIS parameters for the PSCs.

| Device                       | R <sub>s</sub> ( $\Omega$ ) | C <sub>tr</sub> (F)   | R <sub>tr</sub> ( $\Omega$ ) | C <sub>rec</sub> (F)  | R <sub>rec</sub> ( $\Omega$ ) |
|------------------------------|-----------------------------|-----------------------|------------------------------|-----------------------|-------------------------------|
| Control                      | 30.84                       | 3.03×10 <sup>-7</sup> | 958.82                       | 9.27×10 <sup>-9</sup> | 5558.09                       |
| BF <sub>4</sub> <sup>-</sup> | 35.98                       | 2.18×10 <sup>-6</sup> | 928.31                       | 7.53×10 <sup>-9</sup> | 8560.11                       |
